# Supplementary material
Source: HighWire-hosted journal article supplement (http://molpharm.aspetjournals.org/highwire/filestream/77231/field_highwire_adjunct_files/0/Raphemot_Supp_Fig_91884.pdf)
Supplement: Raphemot_Supp_Fig_91884.pdf [file Raphemot_Supp_Fig_91884.pdf]

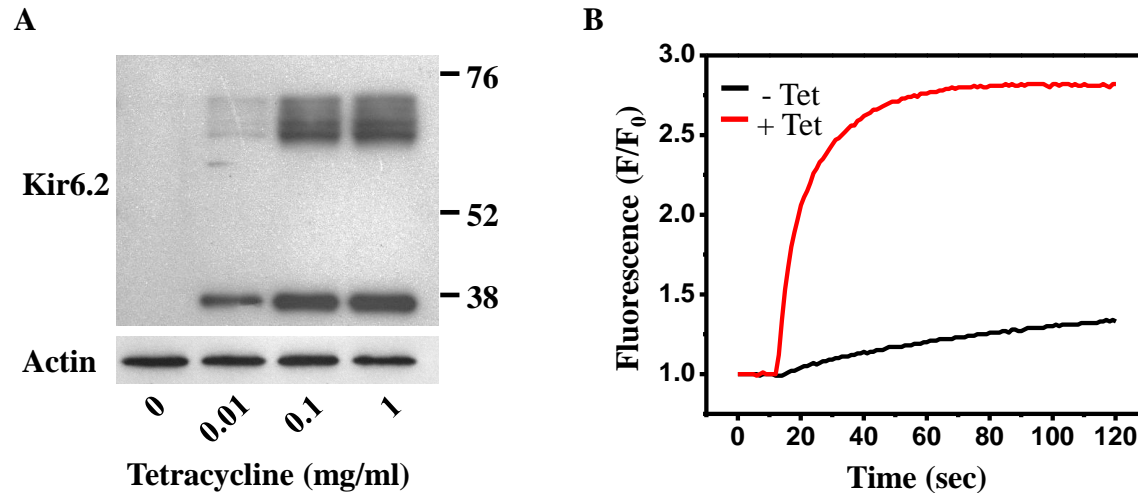

**Direct activation of  $\beta$ -cell  $K_{ATP}$  channels with a novel xanthine derivative. Raphemot, R., Swale, D.R., Dadi, P.K., Jacobson, D.A., Cooper, P., Wojtovich, A.P., Banerjee, S., Nichols, C., Denton, J.S., *Molecular Pharmacology*. T-REx-HEK293-Kir6.2/SUR1 cell line characterization.** A, Cells were cultured overnight with the indicated concentration of tetracycline and subjected to Western blot analysis of Kir6.2 expression in whole-cell lysates. Membranes were stripped and re-probed for b-actin as a loading control. B, Representative  $TI^+$  flux experiment in cells cultured overnight with (red) or without (black) tetracycline and then pre-treated with 250  $\mu$ M diazoxide for 20 min before  $TI^+$  (12 mM  $TI_2SO_4$ ) addition.

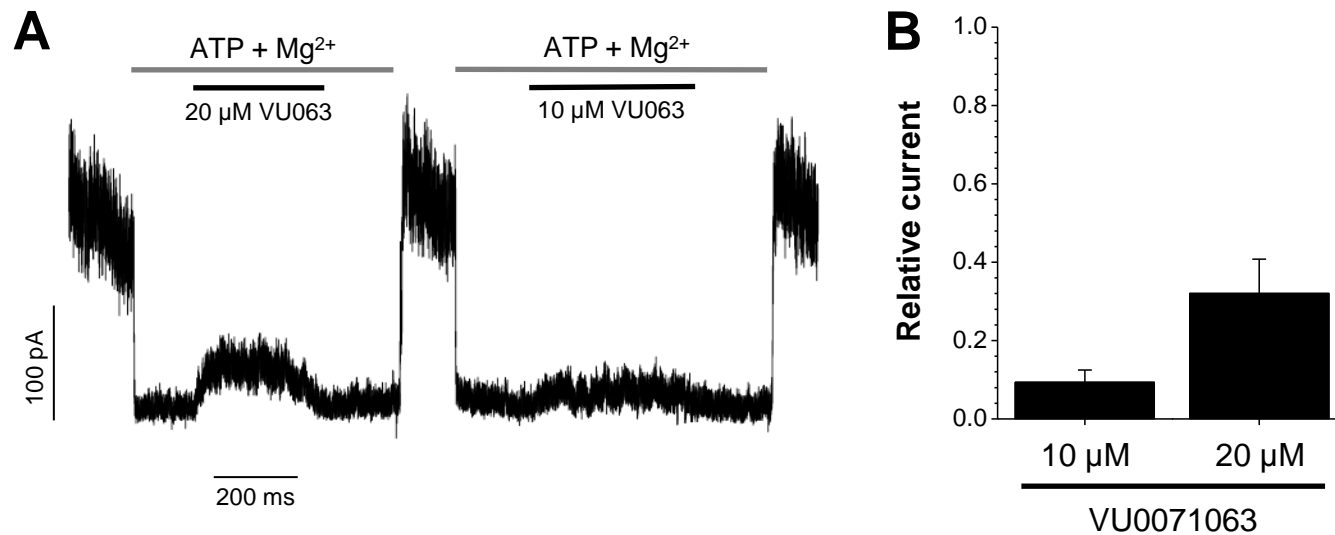

**Direct activation of b-cell K<sub>ATP</sub> channels with a novel xanthine derivative. Raphemot, R., Swale, D.R., Dadi, P.K., Jacobson, D.A., Cooper, P., Wojtovich, A.P., Banerjee, S., Nichols, C., Denton, J.S., *Molecular Pharmacology*. VU0071063 activates Kir6.2/SUR1 in excised inside-out patches. A, Representative inside-out membrane patch of COS cells transiently expressing Kir6.2 and SUR1. Membrane potential held at -50mV. Patches were excised in ATP-free K-internal (150mM-KCl, 10mM-HEPES, 1mM-EGTA) solution and then exposed to 0.1 mM-MgATP followed by 0.1mM-Mg-ATP + VU0071063 (10 μM or 20 μM) solutions as indicated by solid lines above the representative trace. (B) The relative current in 0.1 mM Mg-ATP + VU0071063 (10 μM or 20 μM) with respect to current in ATP-free solution averaged from all recordings (n=4).**

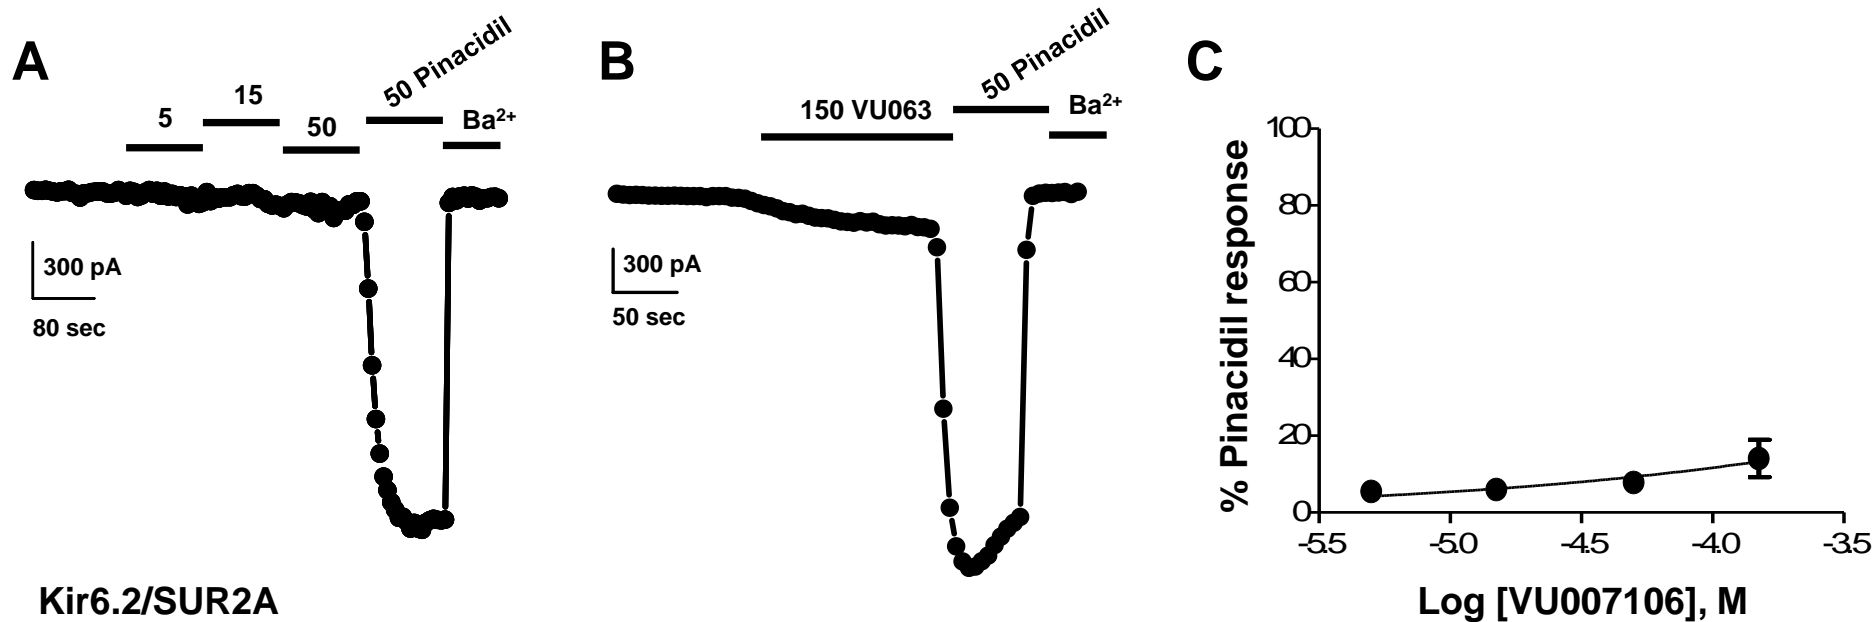

**Direct activation of b-cell K<sub>ATP</sub> channels with a novel xanthine derivative.** Raphemot, R., Swale, D.R., Dadi, P.K., Jacobson, D.A., Cooper, P., Wojtovich, A.P., Banerjee, S., Nichols, C., Denton, J.S., *Molecular Pharmacology*. Lack of effect of VU0071063 on Kir6.2/SUR2A channels. A, Whole-cell Kir6.2/SUR2A currents were measured every 5 sec at -120 mV before and after addition of 5, 15, or 50  $\mu$ M VU007106 or 50  $\mu$ M Pinacidil (positive control), followed by application of 2 mM Ba<sup>2+</sup>. B, Single-dose exposure to 150  $\mu$ M VU0071063 has only a modest effect on Kir6.2/SUR2A channel activity. C, VU0071063 CRC data normalized to 50  $\mu$ M pinacidil response. Data are means  $\pm$  SEM (n = 4 at each dose).

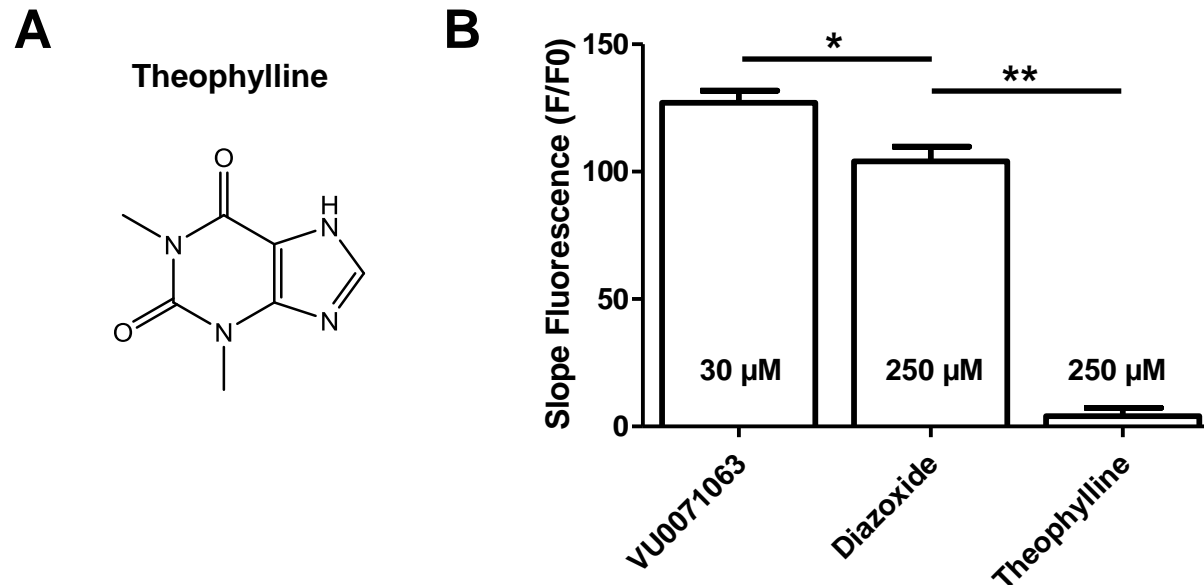

**Direct activation of b-cell K<sub>ATP</sub> channels with a novel xanthine derivative.** Raphemot, R., Swale, D.R., Dadi, P.K., Jacobson, D.A., Cooper, P., Wojtovich, A.P., Banerjee, S., Nichols, C., Denton, J.S., *Molecular Pharmacology*. Lack of effect of theophylline on Kir6.2/SUR1-dependent Tl<sup>+</sup> flux. A, Chemical structure of theophylline. B, Mean ± SEM slope fluorescence recorded from wells treated with 30 μM VU0071063, 250 μM diazoxide, or 250 μM theophylline for 20 min before Tl<sup>+</sup> addition. Data are from 2 independent experiments performed in triplicate. Significance \*P = 0.03, \*\* P = 0.003, unpaired Students t-test.

## Supplementary Figure 5

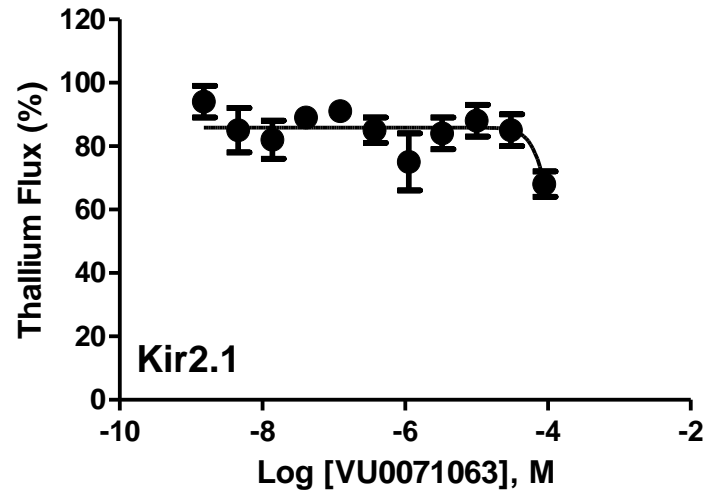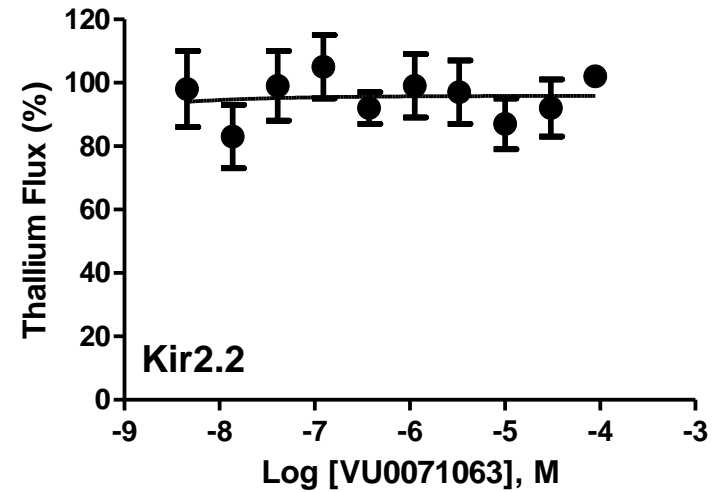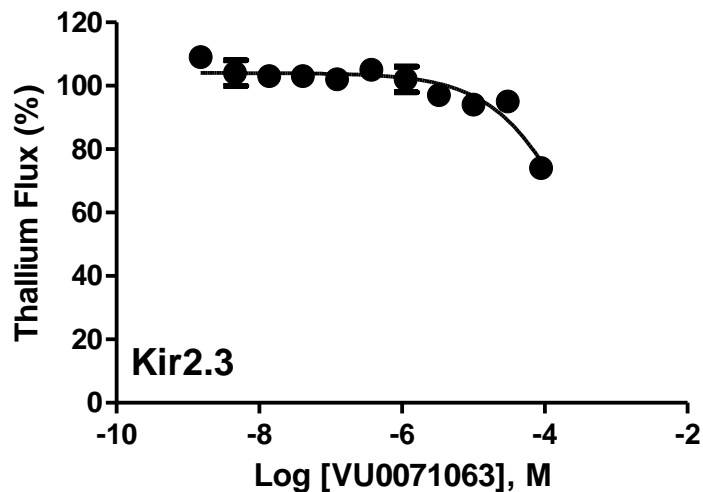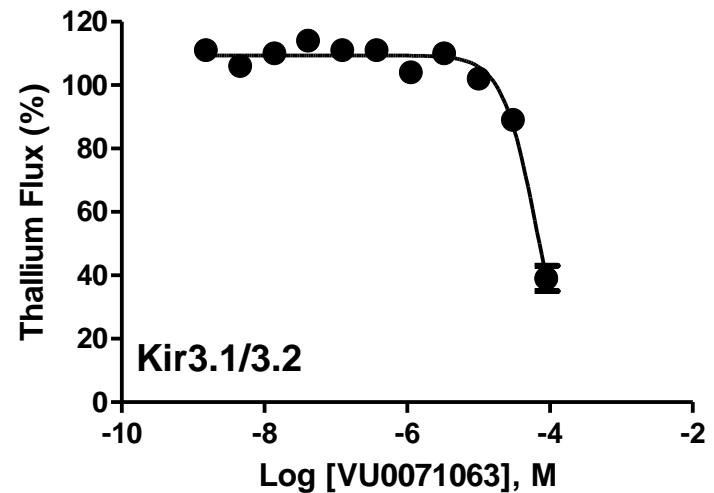

**Direct activation of b-cell  $K_{ATP}$  channels with a novel xanthine derivative.** Raphemot, R., Swale, D.R., Dadi, P.K., Jacobson, D.A., Cooper, P., Wojtovich, A.P., Banerjee, S., Nichols, C., Denton, J.S., *Molecular Pharmacology*. Selectivity of VU0071063 among members of the Kir channel family. 11-point CRC of VU0071063 were established for Kir2.1, Kir2.2, Kir2.3, and Kir3.1/3.2 expressing cell lines (n = 2 independent experiments performed in triplicate per cell line).

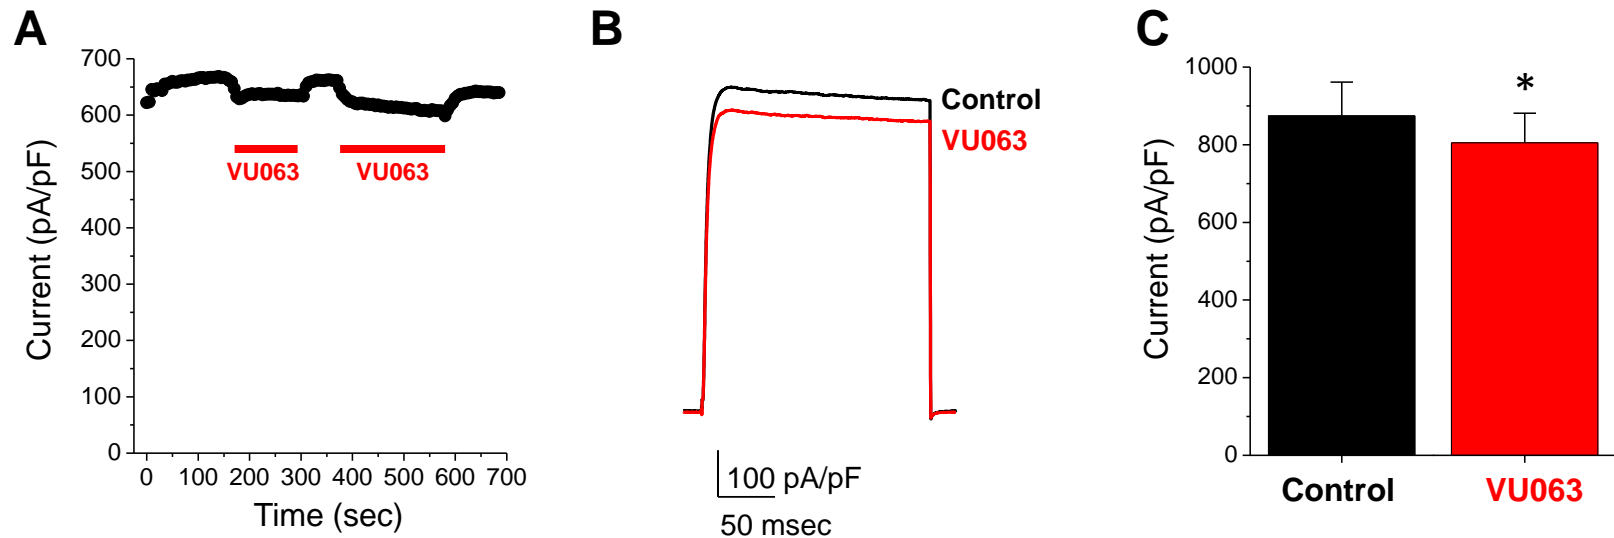

**Direct activation of b-cell  $K_{ATP}$  channels with a novel xanthine derivative. Raphemot, R., Swale, D.R., Dadi, P.K., Jacobson, D.A., Cooper, P., Wojtovich, A.P., Banerjee, S., Nichols, C., Denton, J.S., *Molecular Pharmacology*. Effects of VU0071063 on heterologously expressed Kv2.1.** A, Time versus current amplitude plot illustrating the rapid and reversible inhibition of Kv2.1 current at 40 mV by 10  $\mu$ M VU0071063. B, Representative current traces recorded at 40 mV before and during bath perfusion with 10  $\mu$ M VU0071063. C, Mean SEM current amplitude at 40 mV in the absence (control) or presence of 10  $\mu$ M VU0071063. \* $P = 0.01$ , paired Students t-test.

Supplemental Table 1

| [Compound] $\mu\text{M}$ | Complex II activity (% inhibition) |                |
|--------------------------|------------------------------------|----------------|
|                          | VU0071063                          | Diazoxide      |
| 1                        | $1.5 \pm 3.5$                      | -              |
| 3                        | $-2.2 \pm 4.5$                     | -              |
| 10                       | $2.4 \pm 2.7$                      | $7.6 \pm 2.5$  |
| 30                       | $0.0 \pm 4.3$                      | $14.9 \pm 6.0$ |
| 100                      | $4.9 \pm 2.9$                      | $24.2 \pm 4.3$ |
| 300                      | -                                  | $36.0 \pm 3.5$ |
| 600                      | -                                  | $41.6 \pm 0.7$ |

**Direct activation of b-cell  $K_{\text{ATP}}$  channels with a novel xanthine derivative.** Raphemot, R., Swale, D.R., Dadi, P.K., Jacobson, D.A., Cooper, P., Wojtovich, A.P., Banerjee, S., Nichols, C., Denton, J.S., *Molecular Pharmacology*. Percent inhibition of Complex II activity in response to VU0071063 and diazoxide. underwent three cycles of freeze-thaw and subject to the complex II enzymatic activity assay. Complex II activity was measured mitochondria isolated from mouse hearts using an enzymatic activity. Data are mean  $\pm$  S.E.M. percent inhibition (n=4 independent mitochondria preparations). Control complex II activity was  $88.0 \pm 3.1$  nmol/min/mg protein.
